# Supplementary material for: A splicing variant of Merlin promotes metastasis in hepatocellular carcinoma
Source: PubMed Central journal article supplement (PMC4633634; doi:10.1038/ncomms9457), 2015-10-07
Supplement: ncomms9457-s1.pdf [file ncomms9457-s1.pdf]

## Supplementary Figures

### Supplementary Figure 1

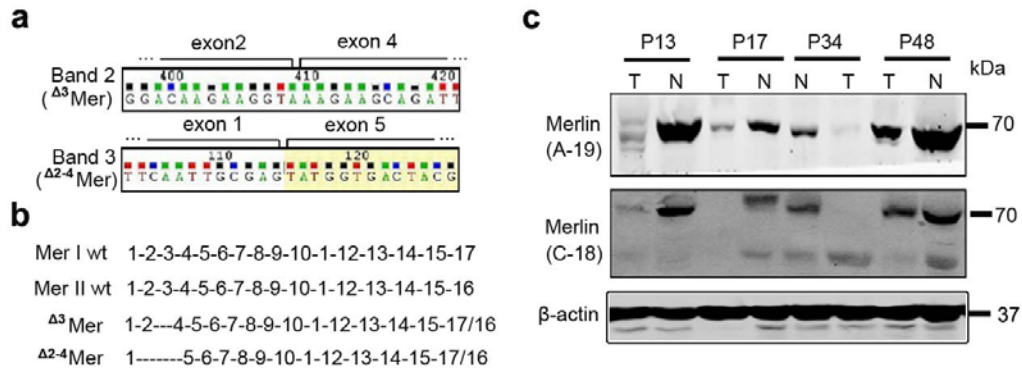

**Supplementary Figure 1.** Detection of  $\Delta^{2-4}$ Merlin in PVTT. **(a)** Sequence analysis of the fragments from Fig. 3b. Upper sequence showed deletion of exon 3. Lower sequence showed deletion of exon 2, 3 and 4. **(b)** Schematic overview of N-terminal frameshift of Merlin.  $\Delta^3$ Mer:  $\Delta^3$ Merlin;  $\Delta^{2-4}$ Mer:  $\Delta^{2-4}$ Merlin. **(c)** Western blots for Merlin proteins from 4 pairs of HCC tumor and tumor adjacent tissues (without PVTT) using antibody (Merlin A-19 and C-18).

## Supplementary Figure 2

Fig. 1c

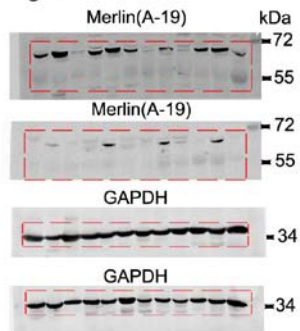

Fig. 2a

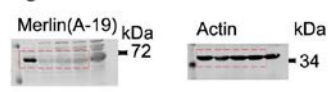

Fig. 2f

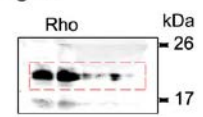

Fig. 2b

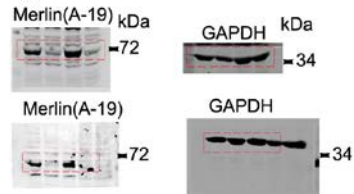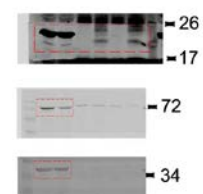

Fig. 3d

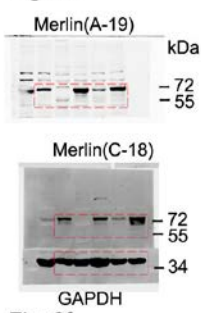

Fig. 3e

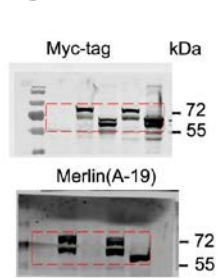

Fig. 3g

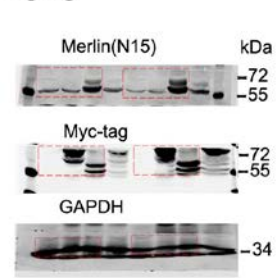

Fig. 3f

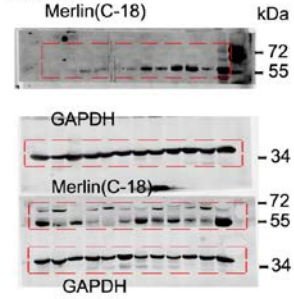

Fig. 3h

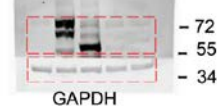

Fig. 3h

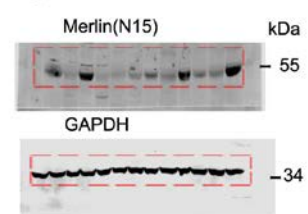

**Supplementary Figure 2 (continued)**

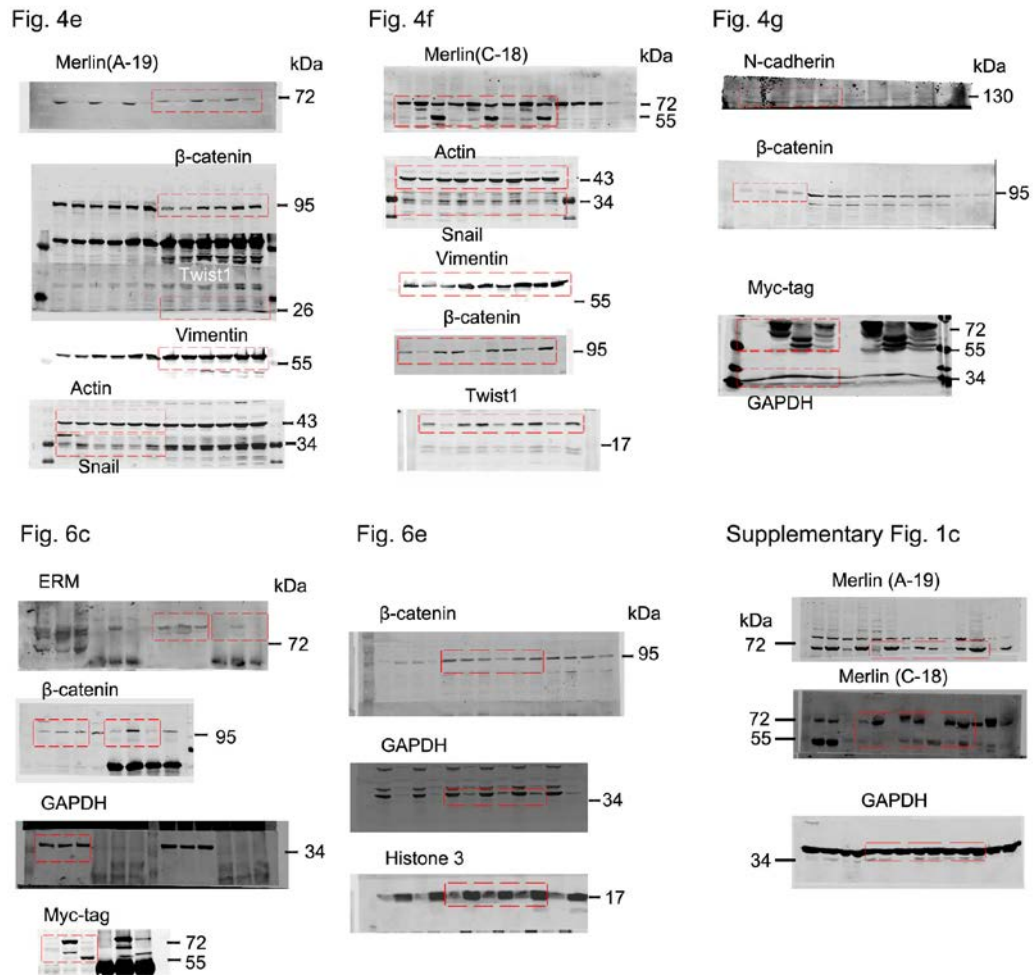

**Supplementary Figure 2.** The original immunoblots for Figure 1, 2, 3, 4, 6 and supplementary Figure 1. Red square represents where a panel in each immunoblot was cut. These images contain protein ladder markers that can partially be seen. We have also labeled the size of ladders on the right side according to the product instruction.

## Supplementary Tables

**Supplementary Table 1.** Analysis of Nf2 exome in HCC patients.

| <b>Sample No. Order</b> | P2234 Tumor | P2234 Adjacent | P2234 PVT | P1243 Tumor | P1243 Adjacent | P1243 PVT | P3432 Tumor | P3432 Adjacent | P3432 PVT |
|-------------------------|-------------|----------------|-----------|-------------|----------------|-----------|-------------|----------------|-----------|
| Exon 1                  | N           | N              | N         | N           | N              | N         | N           | N              | N         |
| Exon2                   | N           | N              | N         | N           | N              | N         | N           | N              | N         |
| Exon3                   | N           | N              | N         | N           | N              | N         | N           | N              | N         |
| Exon4                   | N           | N              | N         | N           | N              | N         | N           | N              | N         |
| Exon5                   | N           | N              | N         | N           | N              | N         | N           | N              | N         |
| Exon6                   | N           | N              | N         | N           | N              | N         | N           | N              | N         |
| Exon7                   | N           | N              | N         | N           | N              | N         | N           | N              | N         |
| Exon8                   | N           | N              | N         | N           | N              | N         | N           | N              | N         |
| Exon9                   | N           | N              | N         | N           | N              | N         | N           | N              | N         |
| Exon10                  | N           | N              | N         | N           | N              | N         | N           | N              | N         |
| Exon11                  | N           | N              | N         | N           | N              | N         | N           | N              | N         |
| Exon12                  | N           | N              | N         | N           | N              | N         | N           | N              | N         |
| Exon13                  | N           | N              | N         | N           | N              | N         | N           | N              | N         |
| Exon14                  | N           | N              | N         | N           | N              | N         | N           | N              | N         |
| Exon15                  | N           | N              | N         | N           | N              | N         | N           | N              | N         |
| Exon16                  | N           | N              | N         | N           | N              | N         | N           | N              | N         |
| Exon17                  | N           | N              | N         | N           | N              | N         | N           | N              | N         |

N: no mutation.

**Supplementary Table 2.** Sequences of PCR primers used for qPCR

| Gene             | Forward primer           | Reverse primer          |
|------------------|--------------------------|-------------------------|
| Oct4             | AGTGAGAGGCAACCTGGAGA     | ACACTCGGACCACATCCTTC    |
| Merlin           | CGAAGCACTGATGCGGTCTG     | TGGGTTTCATGGGCGGGTAC    |
| CD133            | CTGGGGCTGCTGTTTATTATTCTG | ACGCCTTGTCTTGGTAGTGTTG  |
| Sox2             | CAAGATGCACA AACTCGGAGA   | GCTTAGCCTCGTCGATGAAC    |
| KLF4             | CCCACACAGGTGAGAAACCT     | ATGTGTAAAGGCGAGGTGGTC   |
| Notch-1          | TCCACCAGTTTGAATGGTCA     | CGCAGAGGGTTGTATTGGTT    |
| $\beta$ -catenin | GAAACGGCTTTCA GTTGA GC   | CTGGCCATATCCACCA GA GT  |
| C-myc            | ATGGCCATTACAAAGCCG       | TTTCTGGAGTAGCA GCTCCTAA |
| Nanong           | TTTGTGGGCCTGAAGAAA AACT  | AGGGCTGTCTGAATAAGCAG    |
| BMI-1            | CCACCTGATGTGTGTGCTTTG    | TTCAGTAGTGGTCTGGTCTTGT  |
| Vimentin         | CTGGATTCCTCTTCGTGGA      | CGAAAACACCCTGCAATCTT    |
| Snail            | CATCTGAGTGGGTCTGGA GG    | CTTCTCTAGGCCCTGGCTG     |
| Fibronectin      | AAACCAATTCTTGGAGCAGG     | CCATAAAGGGCAACCAAGAG    |
| CD90             | CTAGTGGACCA GA GCCTTCG   | GCACGTGCTTCTTTGTCTCA    |
| EpCAM            | CTGCCAAATGTTTGGTGATG     | AAAGCCCATCATTGTTCTGG    |
| 18S              | CGGCTACCA CATCCA A GGAA  | GCTGGAATTACCGCGGCT      |
